# Supplementary material for: Cooperation between cGAS and RIG-I sensing pathways enables improved innate recognition of HIV-1 by myeloid dendritic cells in elite controllers
Source: PubMed Central journal article supplement (PMC9768436; doi:10.3389/fimmu.2022.1017164), 2022-12-07

**Supplemental Figure 1**

**A**

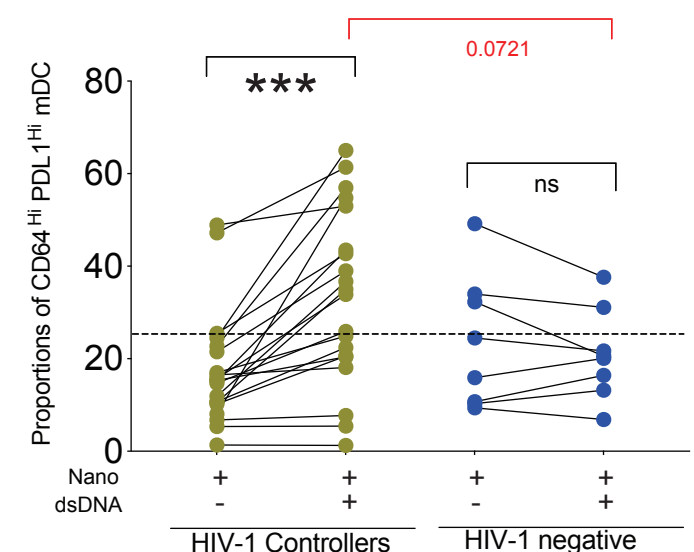

**B**

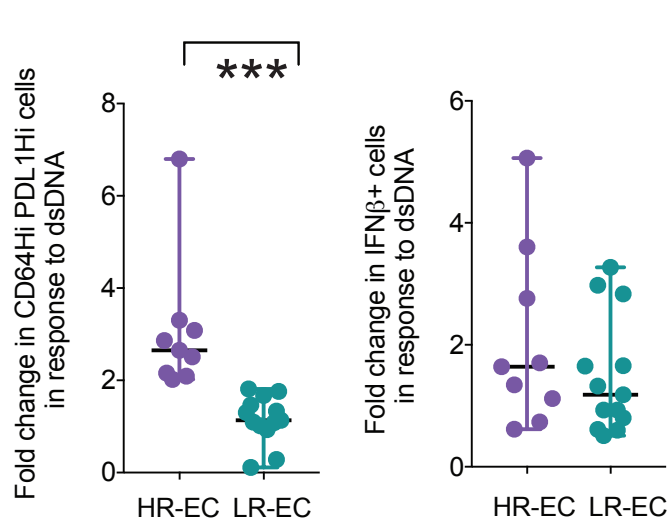

**C**

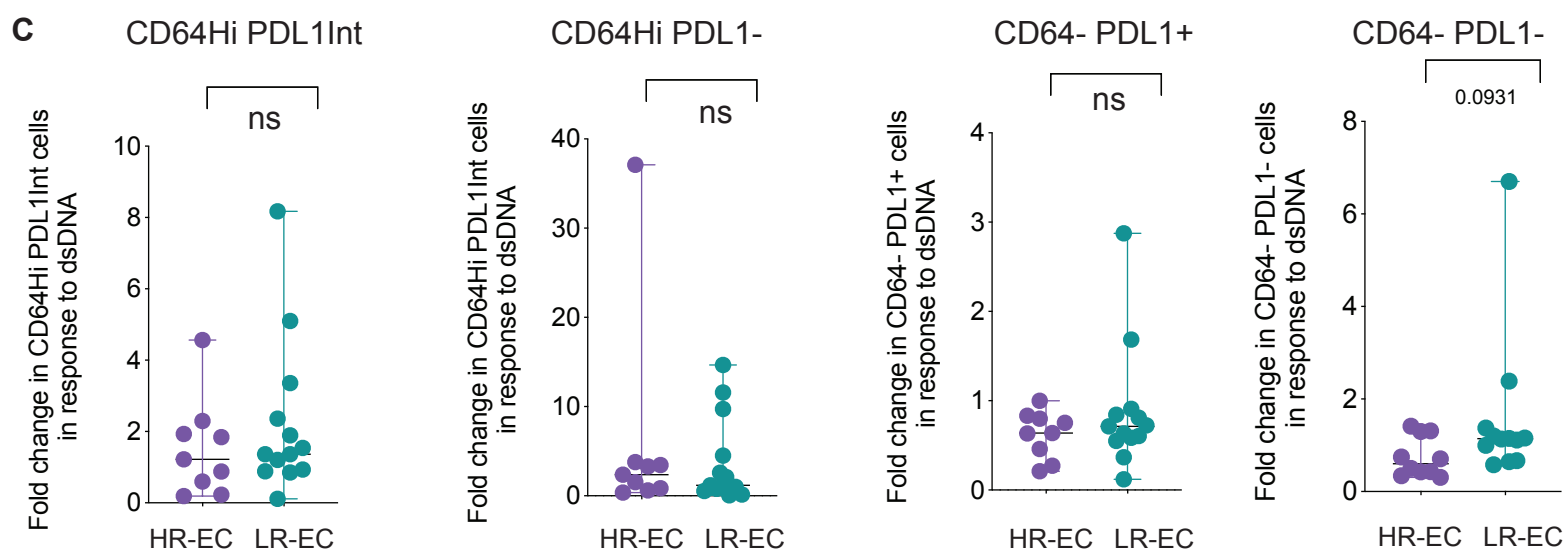

**D**

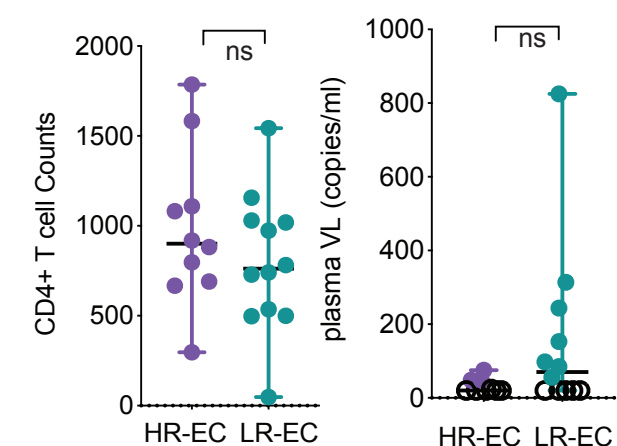

**E**

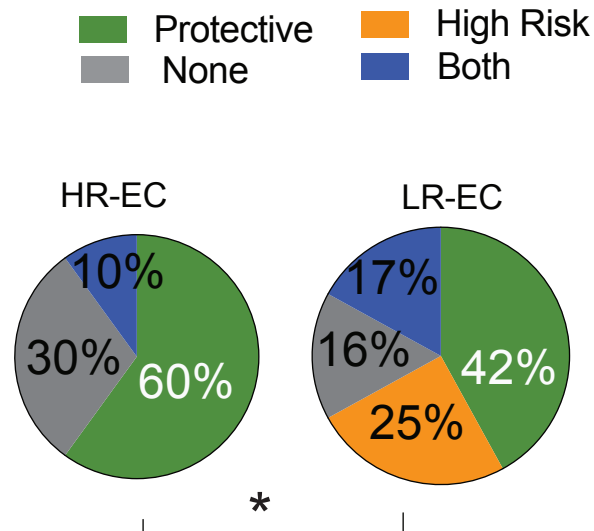

**F**

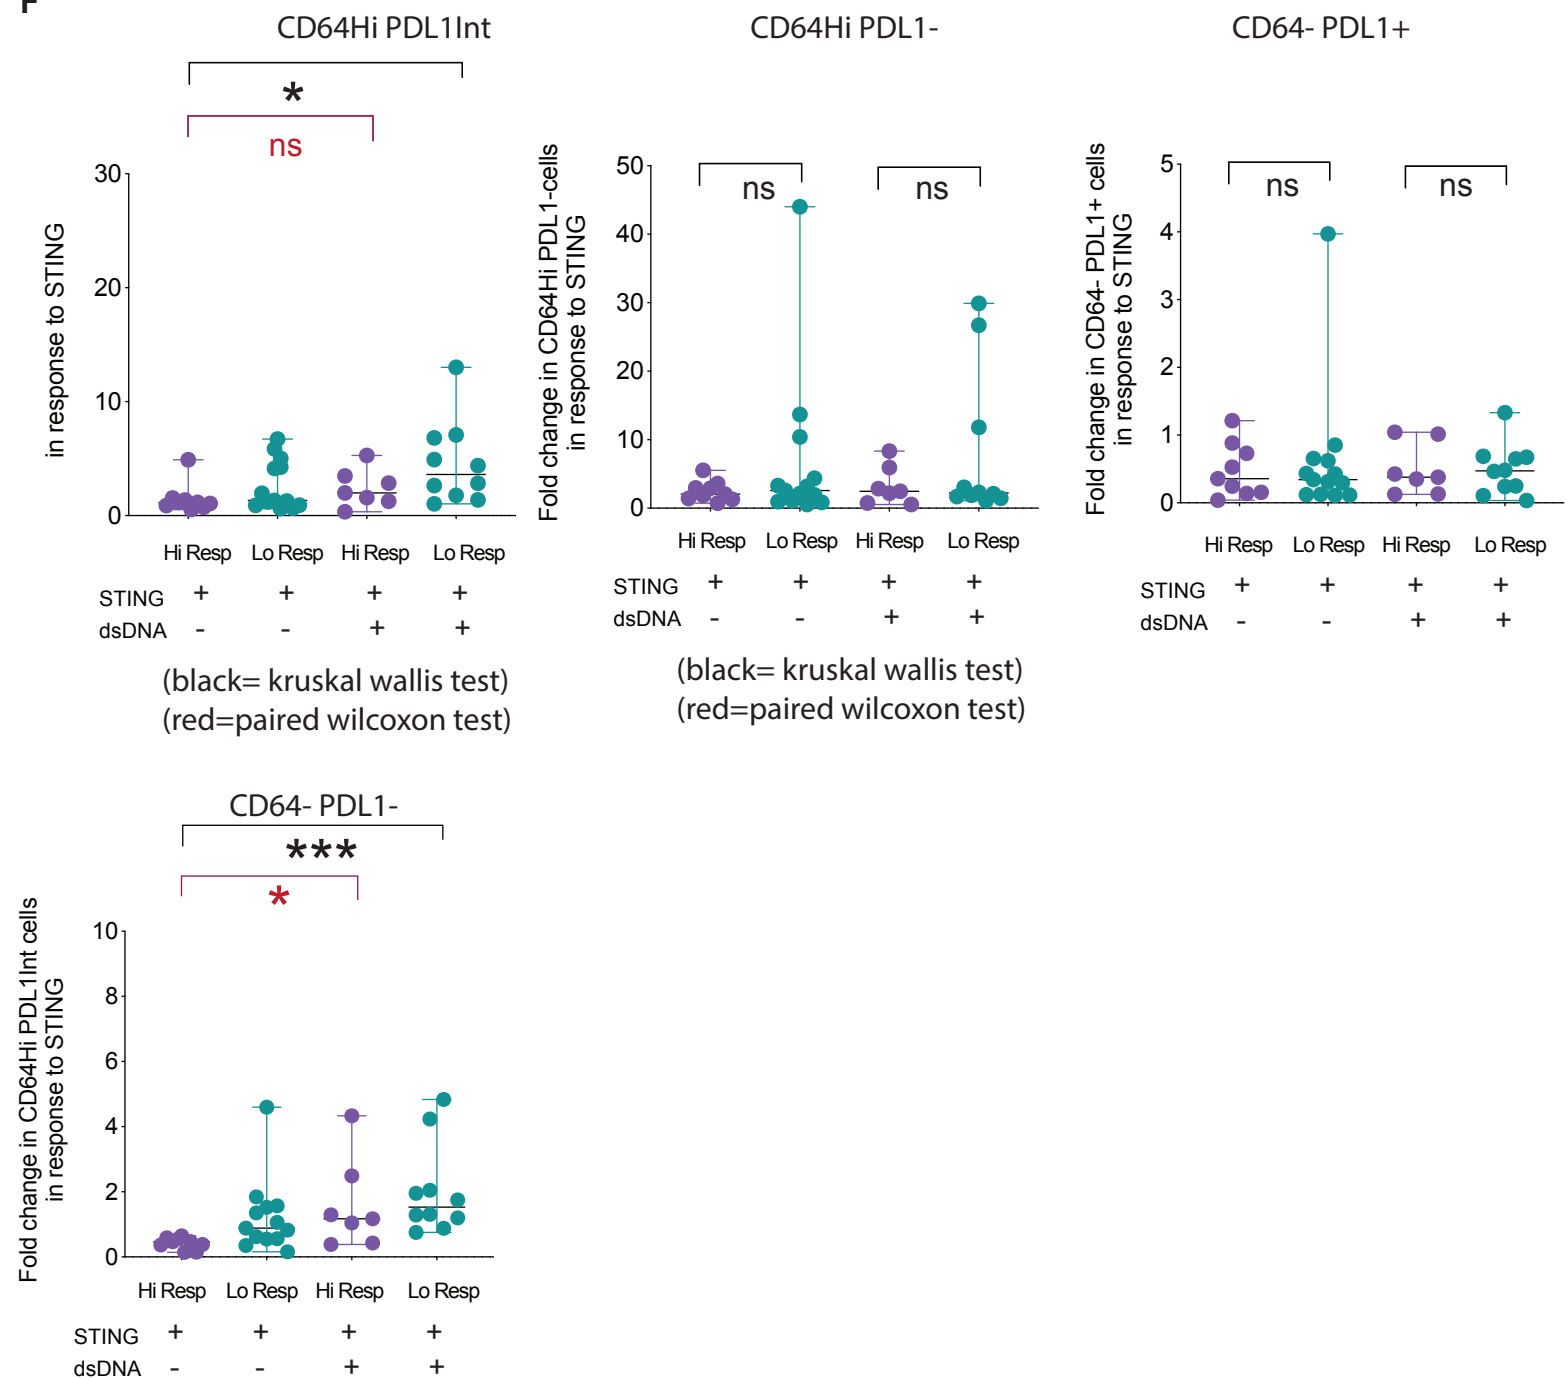

Supplement: DataSheet_3.pdf [file DataSheet_3.pdf]
