# Supplementary material for: Cooperation between cGAS and RIG-I sensing pathways enables improved innate recognition of HIV-1 by myeloid dendritic cells in elite controllers
Source: PubMed Central journal article supplement (PMC9768436; doi:10.3389/fimmu.2022.1017164), 2022-12-07

# Supplemental Figure 2

**A**
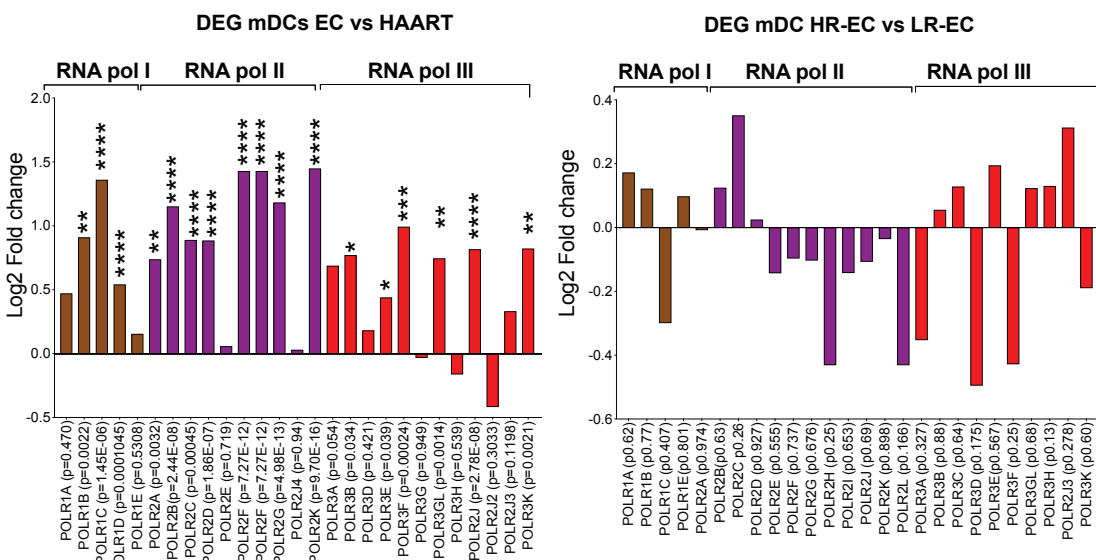
**B**

## Inhibition of SOCS1

 red=Mann whitney test  
 (black=paired wilcoxon test)
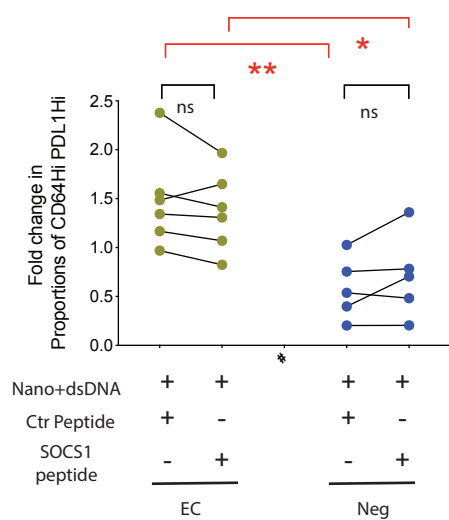
**C**
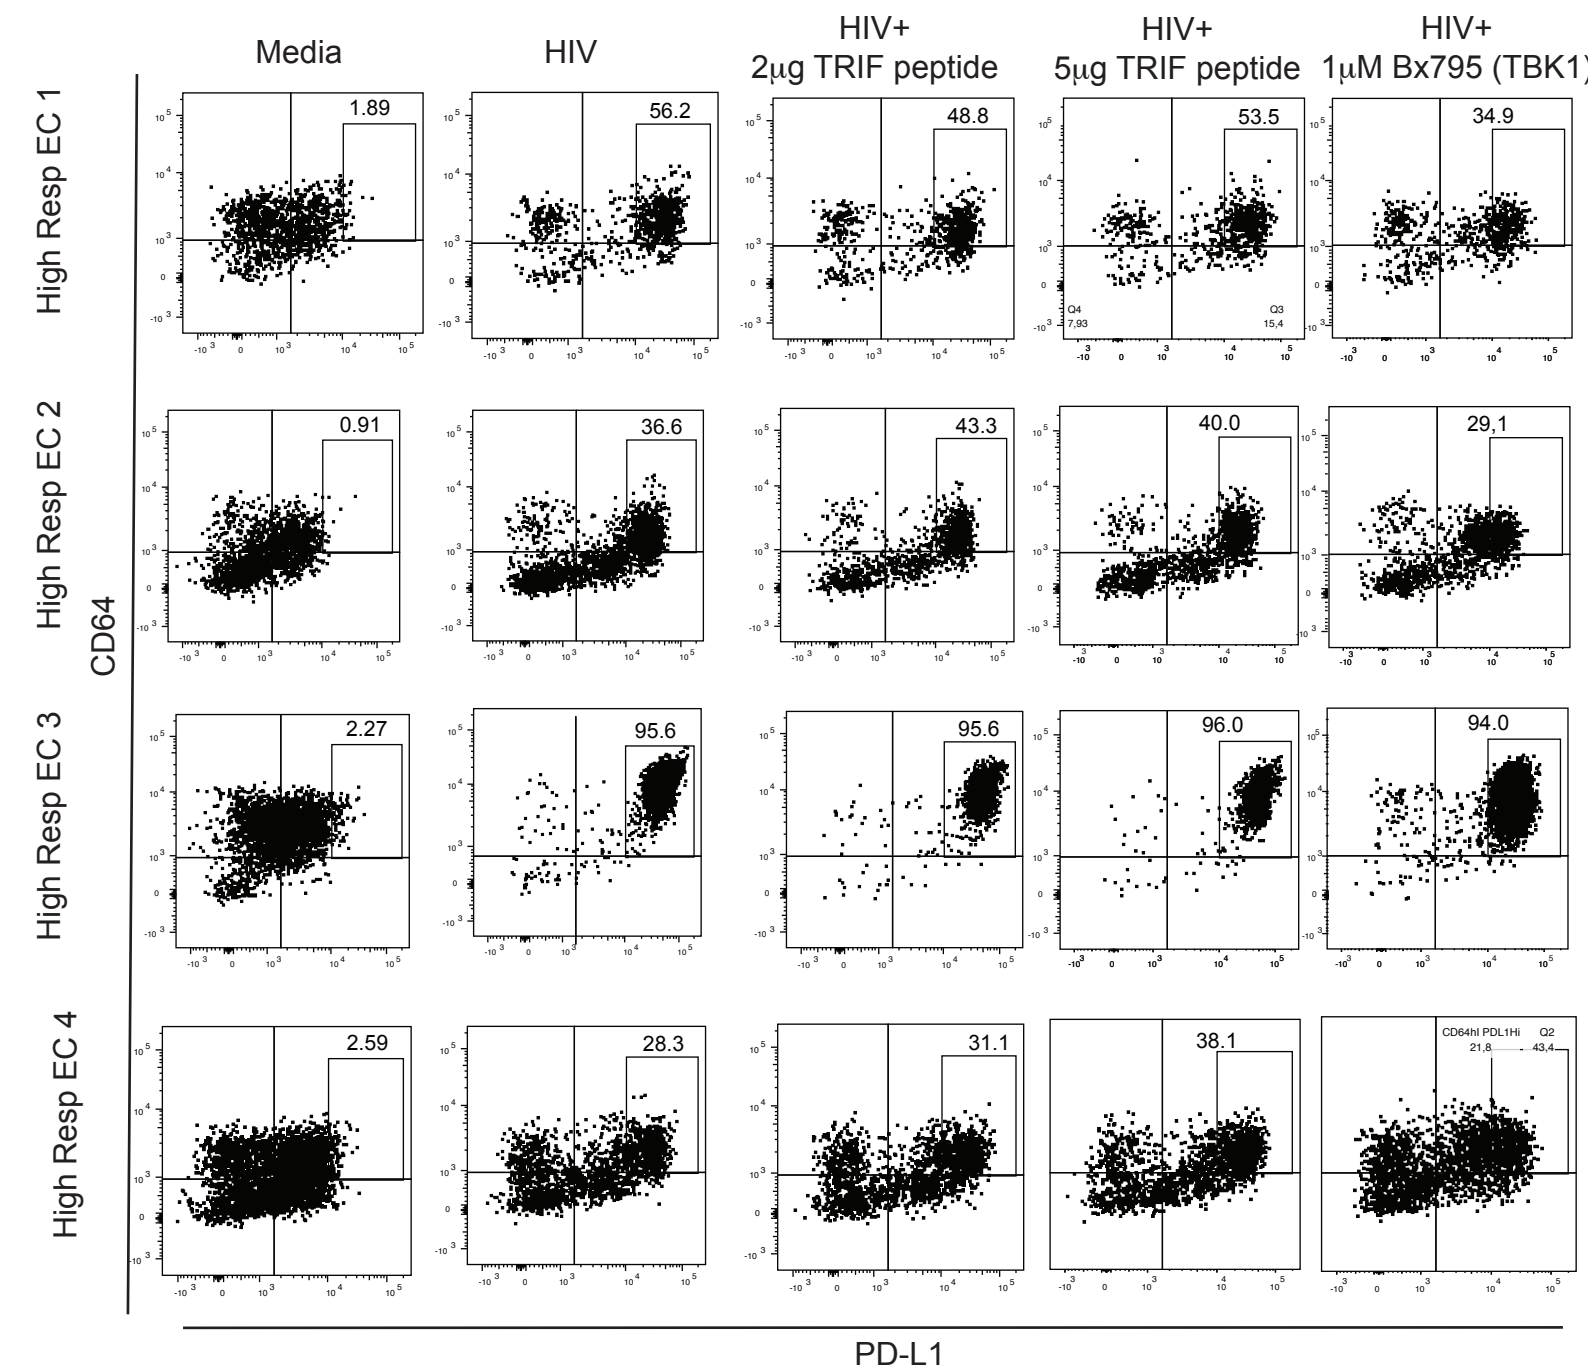
**D**
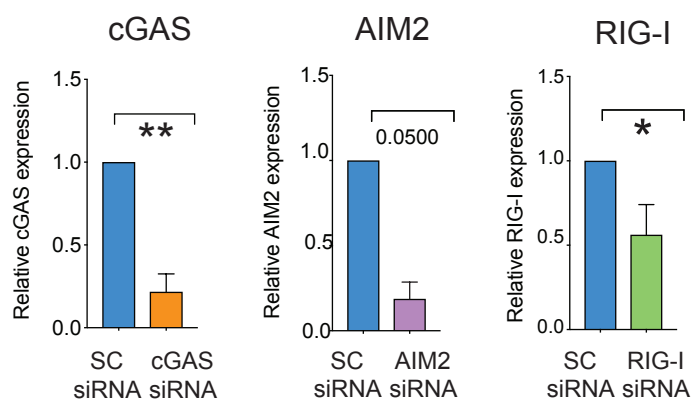

Supplement: DataSheet_4.pdf [file DataSheet_4.pdf]
